# Supplementary material
Source: Springer Nature journal article supplement (https://www.springermedizin.de/resource/supplementary/12876_2013_1099_MOESM2_ESM.pdf/9438472)
Supplement: MOESM2 [file 9438472]

**n=21,700**  
Babies born in southeast Sweden  
October 1997- October 1999

**n=16,285**  
participants with completed at-birth  
questionnaire

**n=4645**  
declined

**n=770**  
participants without questionnaire  
data

**INCLUDED**  
**n=8729**

Available data on use of systemic  
antibiotics during pregnancy and  
data on duration of breastfeeding  
and age at gluten introduction

**EXCLUDED**  
**n=7556**

NO data on use of systemic  
antibiotics during pregnancy or data  
on duration of breastfeeding and age  
at gluten introduction

**n=21,700**  
Babies born in southeast Sweden  
October 1997- October 1999

**n=16,285**  
participants with completed at-birth  
questionnaire

**n=4645**  
declined

**n=770**  
participants without questionnaire  
data

**INCLUDED**  
**n=8729**

Available data on use of systemic  
antibiotics during pregnancy and  
data on duration of breastfeeding  
and age at gluten introduction

**EXCLUDED**  
**n=7556**

NO data on use of systemic  
antibiotics during pregnancy or data  
on duration of breastfeeding and age  
at gluten introduction
